# Supplementary material for: Trauma and sinusitis induce orbital cellulitis in an 11-year-old boy
Source: Research Square preprint supplement (doi:10.21203/rs.3.rs-1041329/v1), 2021-11-08
Supplement: Supplementary file 1 [file 00ff9247e49521db165b8dd4.docx]

| Table S1: Summary of studies reporting on Orbital cellulitis in children in the past 5 years. | | | | | | | | | | |
| --- | --- | --- | --- | --- | --- | --- | --- | --- | --- | --- |
| Patient Information | Ocular Symptoms | Risk Factors | Sinuses involved | Abscess | CT or MRI | Treatment | Prognosis | Pathogen | Antibiotic | Reference |
| 23 patients，mean age 7.8 years) | Fever, swelling, proptosis | Insect bite and local trauma 32.2% | 24.5% | 63.3% | CT | Conservative or endoscopic sinus surgery | Recovered | ------ | Antibiotic | [1] |
| 8years,  male | fever, blurry vision, and pain | no | maxillary and ethmoid sinuses | no | CT and MRI | Conservative | Recovered | no | vancomycin and ampicillin-sulbactam | [2] |
| 11 years,  female | pain, proptosis and decreased vision | Sinusitis | ethmoid and maxillary sinuses | Yes | CT and MRI | endoscopic sinus surgery | Recovered | no | Antibiotic | [3] |
| 14 years,  female | pain, proptosis and decreased vision | no | ethmoid sinuses | Yes | MRI | Conservative and endoscopic sinus surgery | Recovered | Saksenaea vasiformis | liposomal amphotericin B, posaconazole and ceftriaxone | [4] |
| 16 years,  female | fever, decreased vision, and pain | no | no | no | CT | Conservative | Recovered | Staphylococcus aureus | ceftriaxone | [5] |
| 12 years,  female | Pain and proptosis | no | no | no | CT and MRI | Conservative and endoscopic sinus surgery | Recovered | aspergillosis | ceftriaxone, vancomycin and voriconazole | [6] |
| 13 years,  female | Headache, swelling | allergic rhinitis | ethmoid, sphenoid and maxillary sinuses | Yes | CT | Conservative and endoscopic sinus surgery | Recovered | Allergic fungal rhinosinusitis (Drechslera and Bipolaris) | voriconazole | [7] |
| 3 years,  male | Fever, swelling, proptosis | a fall while sucking on a lollipop | no | Yes | MRI | Conservative and surgery | Recovered | Gran- ulicatella adiacens and Atopobium parvulum | clindamycin and ceftriaxone | [8] |
| Mean age: 3years  Male (65%) | Redness and swelling | Insect bite | no | no | no | Conservative | Recovered | no | Antibiotic | [9] |
| 15 years,  male | fever, decreased vision, and swelling | Sinusitis and upper respiratory tract infection | ethmoid and maxillary sinuses | Yes | CT | Conservative and endoscopic sinus surgery | Recovered | Capnocytophaga sputigena | ceftriaxone, cloxacillin and metronidazole | [10] |
| 5 years,  male | Pain, swelling and proptosis | Sinusitis | ethmoid and maxillary sinuses | Yes | CT | Conservative and endoscopic sinus surgery | Recovered | estreptococo beta hemolítico del grupo A | ceftriaxone, vancomycin and ampicillin-sulbactam | [11] |
| 3 years,  female | swelling, red eye and mucopurulent discharge | no | no | no | CT | Conservative | Recovered | Chlamydia trachomatis | clindamycin and azithromycin | [12] |
| Mean age: 6.5 years  Male (71.4%) | swelling, erythema, ptosis, fever | Sinusitis, trauma and upper respiratory tract infection | Sinusitis | Yes (35%) | CT | Conservative (57%) and surgery (43%) | Recovered | Staphylococcus aureus (28.6%) | 28.6% of patients in this study: three antibiotics including Augmentin, metronidazole, ceftazidime, cefuroxime and vancomycin | [13] |
| 17 years,  male | decreased vision, proptosis, and swelling | penetrating injury with a metallic intraocular foreign body | no | no | CT | Conservative and surgery | poor visual | Clostridium perfringens | imipenem, metronidazole and gentamicin | [14] |
| 1 years,  male | swelling | syringing and probing with silicone intubation of the nasolacrimal duct | no | no | MRI | surgery | Recovered | aspergillosis and mucormycosis | amphotericin B and Voriconazole | [15] |
| Median age:2.9 years  Male (56.1%) | fever, decreased vision | Sinusitis, trauma and upper respiratory tract infection | Sinusitis | Yes (1.5%) | CT (13.6) | Conservative (98.5%) and surgery (1.5%) | Recovered | no | ceftriaxone | [16] |
| 15 years,  female | decreased vision, red eye, and swelling | Sinusitis, trauma | maxillary sinuses | no | CT | Conservative and endoscopic sinus surgery | Recovered | no | ceftriaxone and metronidazole | [17] |
| Mean age: 4 years  Male (56.7%) | Proptosis and swelling | sinusitis, skin infection and insect bites |  | Yes (11.7%) | CT (51.7%) or MRI (8.3%) | Conservative (91.7%) and surgery (8.3%) | Recovered | Hemophilus (3.3%), streptococcus (1.7%) and Staphylococcus aureus (1.7%) | Amoxicillin-Clavulanic acid, Cefotaxime, Fosfomycin, Vancomycin | [18] |
| Mean age: 3.9 years  Male (62%) | red eye, and swelling | sinusitis | sinusitis | Yes (15.8%) | CT (38.6%) or MRI (5.3%) | Conservative (74.2%) and surgery (15.8%) | Recurrence of orbital infection (5.3%) | Streptococcus pneumonie (3.5%) | cefotaxime or ceftriaxone) or a combined penicillin (ampicillin-sulbactam; amoxicillin/clavulanic acid) | [19] |
| Mean age: 4.7 years  Male (51.9%) | swelling | no | no | Yes (10.3%) | CT (20%) or MRI | Conservative (48%) and surgery (52%) | Recurrence of orbital infection (2.5%) | Streptococcus pyogenes (36%), Streptococcus anginosus (12%), Haemophilus influenza (8%), Streptococcus pneumoniae (4%) | Cefotaxime and Flu- cloxacillin | [20] |
| 3 years,  female | swelling, fever, complete ophthalmoplegia, ptosis and loss of vision | leukemia | Maxillary and ethmoid sinus | Yes | CT and MRI | Conservative and surgery | orbital exenteration, skull base resection, cerebral debridement with placement of an Ommaya reservoir | mucormycosis | liposomal amphotericin B (L-AmB) and posaconazole | [21] |
| Median age:1.5 years  Male (53%) | red eye, swelling and purulent nasal discharge | sinusitis | sinusitis | Yes (25%) | CT (9%) | Conservative (91.7%) and surgery (8.3%) | Recovered | Streptococcus pneumonia (10.6%) and Staphylococcus aureus (1.1%) | phenoxymethylpenicillin, amoxicillin or amoxicillin/clavulanic acid | [22] |
| 2 years,  male | red eye, and swelling | face paint | no | no | CT | Conservative | Recovered | Neisseria gonorrhoeae | Cefotaxime | [23] |
| 25-day-old  male | fever, swelling and oral cavity bleeding | tooth infection | Maxillary and ethmoid sinus | Yes | CT and MRI | surgery | Recovered | pan sensitive Staphylococcus aureus | linezolid | [24] |
| 12 years, No mention of gender | Headache, red eye, and swelling | sinusitis | maxillo-spheno-ethmoidal rhinosinusitis | Yes | CT and MRI | surgery | Recovered | E. coli | Vancomycin, Meropenem, Gentamicin and Ceftriaxone | [25] |
| 13 years,  male | edema, pain, Herpetiform vesicles and fever | Facial herpes zoster lesions | no | no | CT | Conservative | Recovered | Varicella zoster virus | valaciclovir | [26] |
| 2 years,  female | periorbital swelling, multiple dental caries, upper gum swelling | tooth infection | no | Yes | CT | Conservative and surgery | Recovered | no | amoxicillin/clavulanic acid | [27] |
| 12 years,  male | Headache, red eye, and swelling | resided at myocysticercosis endemic zone | no | no | CT | Conservative and surgery | Recovered | cysticercus | albendazole and steroid | [28] |
| 10 years, No mention of gender | periorbital swelling, purulent nasal discharge | sinusitis | ethmoid sinus | Yes | MRI | surgery | Recovered | Streptococcus pneumoniae | Cefotaxim, Metronidazol und Penicillin | [29] |
| Median age:5 years  Male (50.9%) | swelling, fever and decreased vision | Sinusitis or upper respiratory tract infection (68%) | sinusitis | Yes (16.6%) | CT (29.1%) or MRI (1.1%) | Conservative (82.3%) and surgery (17.7%) | Recovered | Haemophilus influenzae (2.6%), Streptococcus pneumoniae (1.3%) and Staphylococcus aureus (1.3%) | ceftriaxone and metronidazole | [30] |
| 13 years,  male | Headache, and swelling | sinusitis | frontal sinusitis | Yes | CT | Conservative and surgery | Recovered | haemophilus influenza | Antibiotic | [31] |
| Median age:3.5 years  Male (50.9%) | eyelid swelling and hot pain, exophthalmos, ocular movement limits | sinusitis (55%), facial skin furuncle (20%), upper respiratory tract infection (15%) and odontogenic infection (10%) | Maxillary and ethmoid sinus | Yes | CT | Conservative and surgery | Recovered | Staphylococcus aureus, Streptococcus anginosusand MRSA | cefoperazone and sulbactam sodium | [32] |
| Median age:5 years  Male (58.2%) | Fever, photophobia, ocular pain, proptosis and vison impairment | Sinusitis (40.2%), dental abscess (20.4%) and external ocular infections (12.5%) | Maxillary and ethmoid sinus | Yes (8.2%) | CT (49.2%) | Conservative (98.4%) and surgery (1.6%) | Recovered | Haemophilus influenzae (0.8%) and Staphylococcus aureus (0.8%) | Cefuroxime, Ceftriaxone, Co-amoxiclav and Flucloxacillin | [33] |
| 10 years,  male | eyelid swelling and fever | Pneumonia and sinusitis | sinusitis | no | MRI | Conservative | Recovered | H1N1 influenza virus | oseltamivir | [34] |
| Mean age: 3.7 years  Male (53.3%) | erythema | upper respiratory tract infection (27.6%), trauma (4.4%), insect bite (13.4%) and sinusitis (0.9%) | sinusitis | Yes | CT | Conservative | Returned to hospital after 48 hours (25.2%) | Staphylococcus aureus and Streptococcus pyogenes | co-amoxiclav (61.6%), amoxycillin (5.8%), cloxacillin (7.2%), cephalexin (5.2%) and clarithromycin (0.3%) | [35] |
| 6years,  male | periorbital edema, erythema and fever | strabismus surgery | no | no | CT | Conservative | Recovered | Streptococcus pyogenes | ampicillin/sulbactam and vancomycin | [36] |
| 11 years,  female | infraorbital redness and swelling | no | no | Yes | MRI | Conservative and surgery | Recovered | Saksenaea vasiformis | Posaconazole | [37] |
| 8years,  male | swelling, tooth ache, fever | tooth infection | maxillary, ethmoid and sphenoid sinusitis | no | CT | surgery | Recovered | no | Antibiotic | [38] |
| A total of 72 children | swelling | sinusitis | sinusitis | Yes | CT (68.1%) | Conservative (83.3%) and surgery (16.7%) | Recovered | Staphylo- coccus aureus, Streptococcus pyogenes, and Streptococcus pneumoniae | ceftriaxone (with or without metronidazole), and co-amoxiclav | [39] |

1. Ohana-Sarna-Cahan, L., et al., *Factors Associated With Increased Risk of Pediatric Orbital Cellulitis-Who Should Be Scanned?* Pediatr Emerg Care, 2020.

2. Basily, A., et al., *Orbital Cellulitis-When Computed Tomography Imaging Is Falsely Reassuring.* Pediatr Emerg Care, 2021. **37**(1): p. e48-e50.

3. Verma, R., et al., *Orbital Perivenous Abscess Complicating the Diagnosis and Management of Orbital Cellulitis.* Ophthalmic Plast Reconstr Surg, 2017. **33**(6): p. e152-e154.

4. Chen, A.J., et al., *A case of mistaken identity: Saksenaea vasiformis of the orbit.* Orbit, 2020: p. 1-4.

5. Song, W., C. Du, and Y. Zhang, *A case report of exudative retinal detachment derived from orbital cellulitis in mainland China.* BMC Ophthalmol, 2020. **20**(1): p. 332.

6. Gupta, J., et al., *A rare infective cause of stroke in an immunocompetent child.* Brain Dev, 2021. **43**(1): p. 152-156.

7. Lisac, R.R., et al., *Allergic fungal rhinosinusitis presenting with intracranial spread along large sphenoidal emissary foramen.* Med Mycol Case Rep, 2021. **32**: p. 10-13.

8. Glass, G.E., et al., *An Orbital Abscess Secondary to Intraoral Impalement.* J Craniofac Surg, 2020. **31**(4): p. 1111-1113.

9. Friedel, N., et al., *Are We Over-Treating Insect Bite Related Periorbital Cellulitis in Children? The Experience of a Large, Tertiary Care Pediatric Hospital.* Am J Ther, 2019. **26**(1): p. e1-e4.

10. Daigle, P., et al., *Capnocytophaga sputigena as a cause of severe orbital cellulitis and subperiosteal abscess in a child.* Can J Ophthalmol, 2021. **56**(3): p. e90-e92.

11. Ruíz Carrillo, J.D., E. Vázquez Guerrero, and M.C. Mercado Uribe, *[Orbital cellulitis complicated by subperiosteal abscess due to Streptococcus pyogenes infection].* Bol Med Hosp Infant Mex, 2017. **74**(2): p. 134-140.

12. Haddad, N.M., et al., *Chlamydia trachomatis presenting as preseptal cellulitis in a 3-year-old girl.* J aapos, 2019. **23**(4): p. 245-246.

13. Mohd-Ilham, I., et al., *Clinical characteristics and outcomes of paediatric orbital cellulitis in Hospital Universiti Sains Malaysia: a five-year review.* Singapore Med J, 2020. **61**(6): p. 312-319.

14. Guedira, G., et al., *Clostridium perfringens panophthalmitis and orbital cellulitis: a case report.* BMC Ophthalmol, 2018. **18**(1): p. 88.

15. Habroosh, F.A., H. Eatamadi, and R.M. Mohamed, *Concomitant orbital aspergillosis and mucormycosis in a 17 months old immunocompetent child.* Saudi J Ophthalmol, 2017. **31**(3): p. 193-195.

16. Tritt, A., et al., *Daily outpatient intravenous antibiotic therapy for the management of paediatric periorbital cellulitis, a retrospective case series.* Clin Otolaryngol, 2019. **44**(3): p. 273-278.

17. Laycock, J., et al., *Facial trauma aggravating paediatric orbital cellulitis.* BMJ Case Rep, 2020. **13**(4).

18. Saadouli, D., et al., *[Orbital cellulitis in children: Report of 60 cases].* J Fr Ophtalmol, 2019. **42**(10): p. 1056-1061.

19. Sciarretta, V., et al., *Management of orbital cellulitis and subperiosteal orbital abscess in pediatric patients: A ten-year review.* Int J Pediatr Otorhinolaryngol, 2017. **96**: p. 72-76.

20. Crosbie, R.A., J. Nairn, and H. Kubba, *Management of paediatric periorbital cellulitis: Our experience of 243 children managed according to a standardised protocol 2012-2015.* Int J Pediatr Otorhinolaryngol, 2016. **87**: p. 134-8.

21. Levinsen, M., et al., *Medical and surgical treatment of rhino-orbital-cerebral mucormycosis in a child with leukemia.* Am J Ophthalmol Case Rep, 2021. **22**: p. 101092.

22. Schollin Ask, L., et al., *Most preschool children hospitalised for acute rhinosinusitis had orbital complications, more common in the youngest and among boys.* Acta Paediatr, 2017. **106**(2): p. 268-273.

23. Pereira-Ospina, R.D.P., et al., *[Neisseria gonorrhoeae: an infrequent causal agent of periorbital cellulitis in a child].* Arch Argent Pediatr, 2017. **115**(4): p. e243-e246.

24. White, M., et al., *Neonatal tooth infection resulting in subperiosteal orbital abscess: A case report.* Int J Pediatr Otorhinolaryngol, 2021. **140**: p. 110524.

25. Constantin, F., et al., *Orbital cellulitis and brain abscess - rare complications of maxillo-spheno-ethmoidal rhinosinusitis.* Rom J Ophthalmol, 2017. **61**(2): p. 133-136.

26. El Hamichi, S., et al., *Orbital cellulitis due to ophthalmic herpes zoster in an immunocompetent child: A case report.* J Fr Ophtalmol, 2017. **40**(7): p. e255-e256.

27. Abdul Satar, H., et al., *Orbital Cellulitis Secondary to Dental Abscess in Children.* Cureus, 2021. **13**(4): p. e14392.

28. Hamal, D., et al., *Orbital Myocysticercosis different Presentation and Management in Eastern Nepal.* Nepal J Ophthalmol, 2020. **12**(23): p. 125-132.

29. Bajor, A., et al., *[Orbital complication of acute sinusitis : Orbital cellulitis in a 10-year-old child].* Ophthalmologe, 2017. **114**(4): p. 365-369.

30. Murphy, D.C., et al., *Paediatric periorbital cellulitis: A 10-year retrospective case series review.* J Paediatr Child Health, 2021. **57**(2): p. 227-233.

31. McKenna, D., E. Reddy, and E. McKenna, *Pediatric intraorbital abscess: Early recognition and management.* Clin Case Rep, 2019. **7**(3): p. 593-594.

32. Hongguang, P., et al., *Pediatric nasal orbital cellulitis in Shenzhen (South China): Etiology, management, and outcomes.* Int J Pediatr Otorhinolaryngol, 2016. **87**: p. 98-104.

33. Santos, J.C., et al., *Pediatric preseptal and orbital cellulitis: A 10-year experience.* Int J Pediatr Otorhinolaryngol, 2019. **120**: p. 82-88.

34. Smitha, K.S., et al., *Pediatric viral orbital cellulites secondary to H1N1 infection: A case report.* Indian J Ophthalmol, 2019. **67**(7): p. 1234-1235.

35. James, V., et al., *Periorbital Cellulitis in Paediatric Emergency Medicine Department Patients.* Ann Acad Med Singap, 2018. **47**(10): p. 420-423.

36. Somsen, D. and G. Heidary, *Rapid onset of orbital cellulitis after uncomplicated strabismus surgery.* J aapos, 2019. **23**(5): p. 290-291.

37. Reich, P., et al., *Saksenaea vasiformis Orbital Cellulitis in an Immunocompetent Child Treated With Posaconazole.* J Pediatric Infect Dis Soc, 2018. **7**(3): p. e169-e171.

38. Jaisani, M.R., et al., *Tension orbit secondary to a carious primary molar-A case report.* Clin Case Rep, 2021. **9**(4): p. 2053-2056.

39. Mahalingam, S., et al., *The management of periorbital cellulitis secondary to sinonasal infection: a multicenter prospective study in the United Kingdom.* Int Forum Allergy Rhinol, 2020. **10**(6): p. 726-737.
